# Supplementary material for: DsbA-L Alleviates Endoplasmic Reticulum Stress–Induced Adiponectin Downregulation
Source: PubMed Central journal article supplement — Diabetes. 2010 Aug 10;59(11):2809–16. doi: 10.2337/db10-0412 (PMC2963539; doi:10.2337/db10-0412), 2010-08-10

ONLINE APPENDIX

**Figure S1.** db/db mice and the lean control mice were injected with TUDCA (250mg/kg) or vehicle (saline) only, the body weight change were measured everyday 3 days. The body weight form 3 groups (lean saline, n=10; db/db saline, n=8; db/db TUDCA, n=8) were compared and analyzed

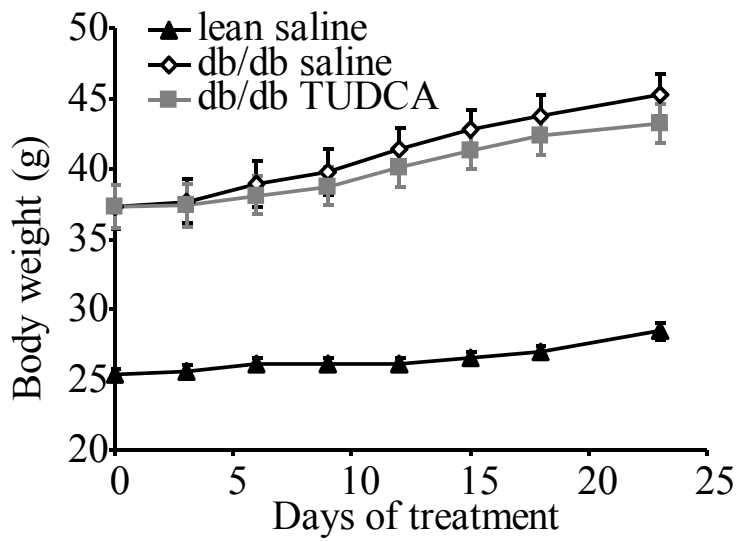

**Figure S2. (A).** C57/B6 mice fed with high fat diet for 5 months. Before sacrifice, the mice were injected with TUDCA (250mg/kg) or vehicle (saline) for 3 weeks. The expression levels of adiponectin, DsbA-L, CHOP,  $\beta$ -actin in white adipose tissue and adiponectin levels in serum were determined by western blot analysis with specific antibodies as indicated. The expression levels change of adiponectin in serum **(B)** and in white adipose tissue **(C)**, DsbA-L **(D)**, and CHOP **(E)** in white adipose tissue were quantified and normalized to  $\beta$ -actin levels. Data represent the mean  $\pm$  SEM. n=3. \*p<0.05, \*\*p <0.01

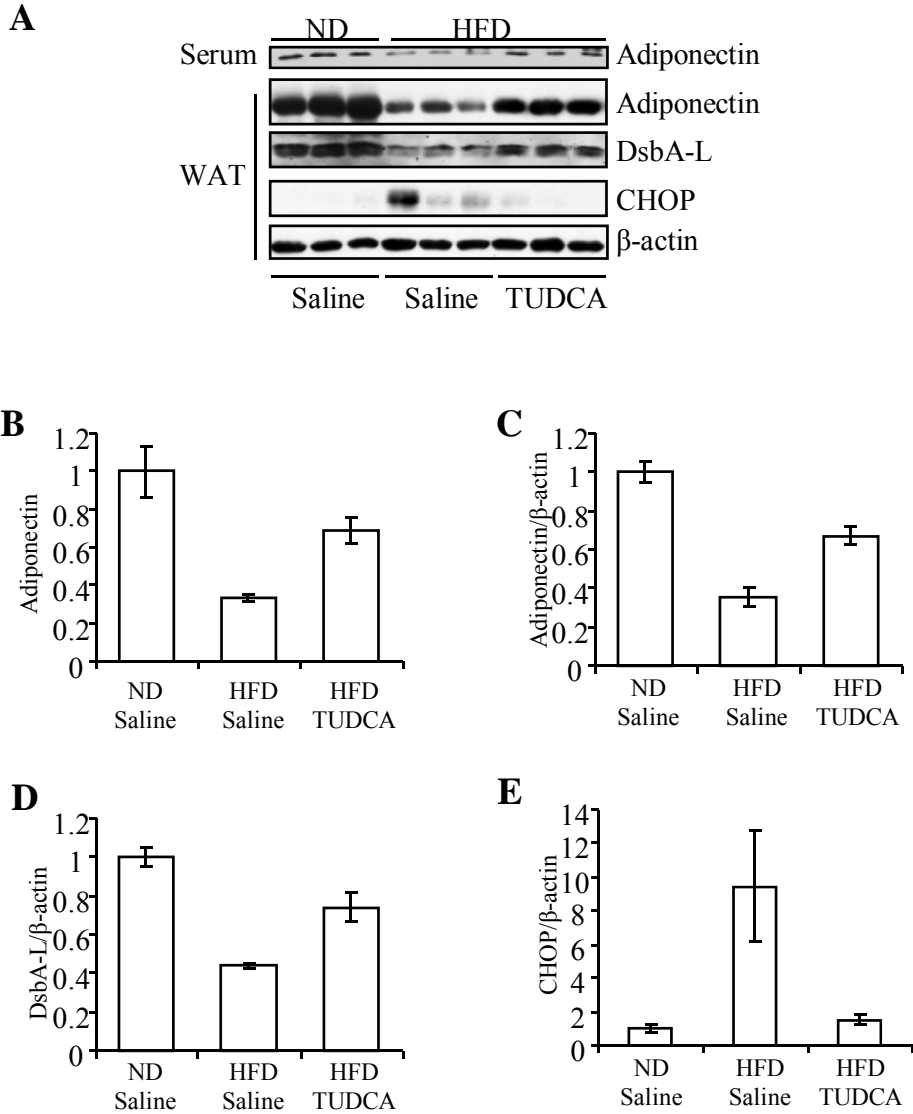

**Figure S3. (A)** Insulin (2 IU/kg) tolerance tests (ITT) of lean control mice with vehicle (saline) treatment and db/db mice treated with vehicle (saline) or TUDCA for 18 days. Data represent the mean  $\pm$  SEM. n=5. \*\* $p < 0.01$  (TUDCA vs vehicle-treated db/db mice). **(B)** Glucose levels before insulin injection in ITT experiments. Data represent the mean  $\pm$  SEM. n=5. \*\* $p < 0.01$ , \*\*\* $p < 0.001$

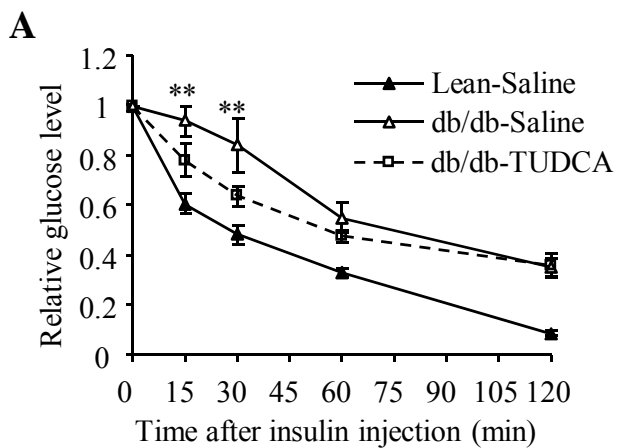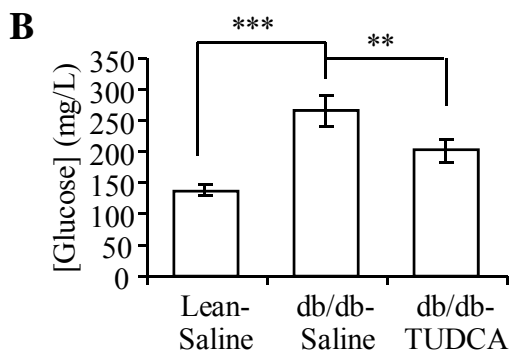

**Figure S4.** (A) C2C12 myotubes and (B) murine hepatocytes were pretreated with 1mM TUDCA for 24 hours and then lysed. The expression levels and phosphorylation levels of AMPK (thr<sup>172</sup>) and ACC (ser<sup>79</sup>) were determined by Western blot with specific antibodies as indicated. The data represents 3 independent experiments with similar results.

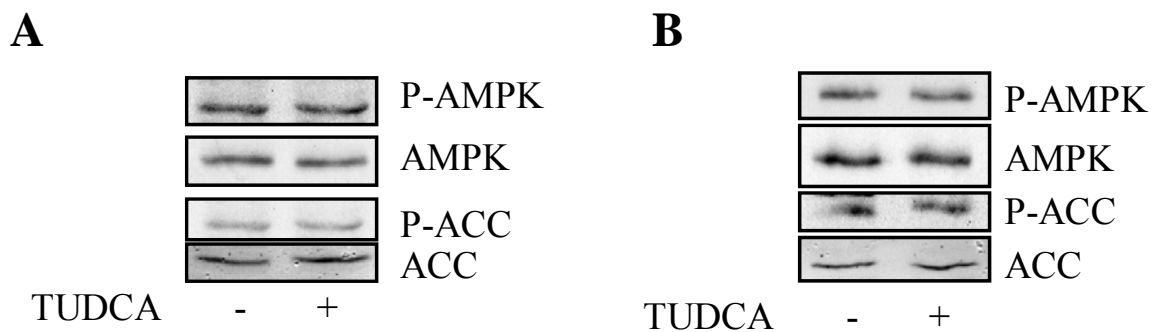

Supplement: supp_db10-0412_db100412onlineappendix.pdf [file supp_db10-0412_db100412onlineappendix.pdf]
